# Supplementary material for: Utilization of green resource-based Mimosa pudica hydrogel powder in a cellulose acetate-based polymeric membrane as absorbent: a sustainable approach towards female hygiene application
Source: Royal Society of Chemistry journal article supplement (doi:10.1039/d4su00381k), 2024-01-01
Supplement: d4su00381k1.pdf [file d4su00381k1.pdf]

## Supporting Information 1.

### Chemical Analysis

**Table 1.** Molecular vibration mode and its corresponding wavenumber for neat CA formulations

| Vibration<br>↓<br>Sample → | Appearance   | Neat CA 2.5wt%<br>Wavenumber<br>(cm <sup>-1</sup> ) | Neat CA 5wt.%<br>Wavenumber<br>(cm <sup>-1</sup> ) | Neat CA 10wt.%<br>Wavenumber<br>(cm <sup>-1</sup> ) |
|----------------------------|--------------|-----------------------------------------------------|----------------------------------------------------|-----------------------------------------------------|
| O-H Stretching             | Strong broad | 3472                                                | 3475                                               | 3475                                                |
| C-H<br>Stretching          | Medium       | 2930                                                | 2929                                               | 2929                                                |
| C=O<br>Stretching          | Strong       | 1735                                                | 1736                                               | 1741                                                |
| CH <sub>2</sub><br>Bending | Medium       | 1435                                                | 1431                                               | 1431                                                |
| O-H<br>Bending             | Medium       | 1367                                                | 1368                                               | 1370                                                |
| C-O-C<br>Stretching        | Strong       | 1220                                                | 1221                                               | 1221                                                |
| C-O<br>Stretching          | Strong       | 1161                                                | 1159                                               | 1161                                                |
| -C-OH-<br>Bending          | Medium       | 1033                                                | 1031                                               | 1031                                                |
| -C-O<br>Stretching         | Strong       | 901                                                 | 901                                                | 901                                                 |

**Table 2. (a).** Molecular vibration and its corresponding wave number for *Mimosa Pudica* Seeds and MPH particles

| Vibration<br>↓<br>Samples<br>→ | Appearance   | Mimosa Pudica Seed<br>(cm <sup>-1</sup> ) | Mimosa Pudica<br>Hydrogel (MPH)<br>Powder<br>(cm <sup>-1</sup> ) |
|--------------------------------|--------------|-------------------------------------------|------------------------------------------------------------------|
| -OH Stretching                 | Strong Broad | 3280                                      | 3280                                                             |
| -CH Stretching                 | Medium       | 2930                                      | 2930                                                             |
| C=O Stretching                 | Strong       | -                                         | 1743                                                             |
| -NH <sub>2</sub> Stretching    | Medium       | 1638                                      | 1638                                                             |
| -CH <sub>3</sub> bending       | Medium       | 1398                                      | 1322                                                             |
| C-O Stretching                 | Medium       | 1162                                      | 1162                                                             |
| C-N Stretching                 | Strong       | 1034                                      | 1034                                                             |
| O-C=O Stretching               | Medium       | 869                                       | 869                                                              |

**Table 2. (b).** Molecular vibration and its corresponding wave number for optimized 5wt.% CA and Modified CA/MPH membrane

| Vibration<br>↓<br>Sample→  | Appearance   | Neat CA 5wt%<br>Wavenumber<br>(cm <sup>-1</sup> ) | MCA-1<br>Wavenumber<br>(cm <sup>-1</sup> ) | MCA-2<br>Wavenumber<br>(cm <sup>-1</sup> ) | MCA-3<br>Wavenumber<br>(cm <sup>-1</sup> ) |
|----------------------------|--------------|---------------------------------------------------|--------------------------------------------|--------------------------------------------|--------------------------------------------|
| O-H Stretching             | Strong broad | 3475                                              | 3480                                       | 3480                                       | 3480                                       |
| C-H<br>Stretching          | Medium       | 2929                                              | 2930                                       | 2930                                       | 2930                                       |
| -C≡N<br>Stretching         | Medium       | -                                                 | 2160                                       | 2160                                       | 2160                                       |
| C=O<br>Stretching          | Strong       | 1736                                              | 1730                                       | 1730                                       | 1730                                       |
| CH <sub>2</sub><br>Bending | Medium       | 1431                                              | 1430                                       | 1430                                       | 1430                                       |
| O-H<br>Bending             | Medium       | 1368                                              | 1370                                       | 1370                                       | 1370                                       |
| C-O-C<br>Stretching        | Strong       | 1221                                              | 1220                                       | 1220                                       | 1220                                       |
| C-O<br>Stretching          | Strong       | 1159                                              | 1160                                       | 1160                                       | 1160                                       |
| -C-OH-<br>Bending          | Medium       | 1031                                              | 1030                                       | 1030                                       | 1030                                       |
| C-O<br>Stretching          | Strong       | 901                                               | 901                                        | 901                                        | 901                                        |

**Biodegradation test:**

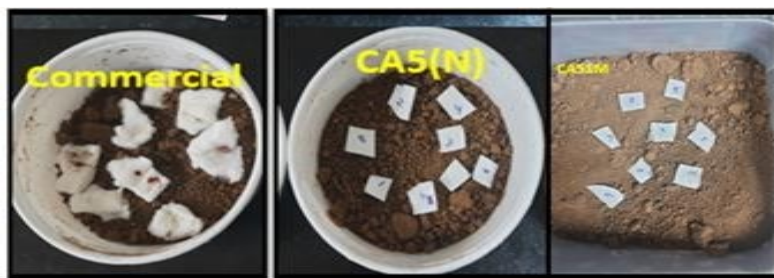

Fig.1. Experimental setup for soil burial test

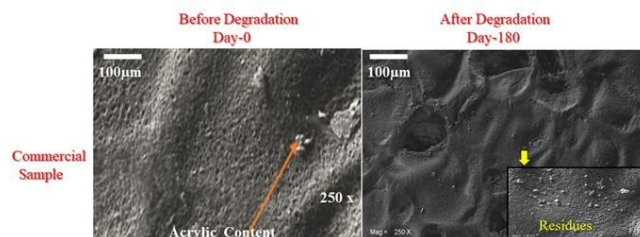

Fig.2. Degradation SEM image of commercial sample as control

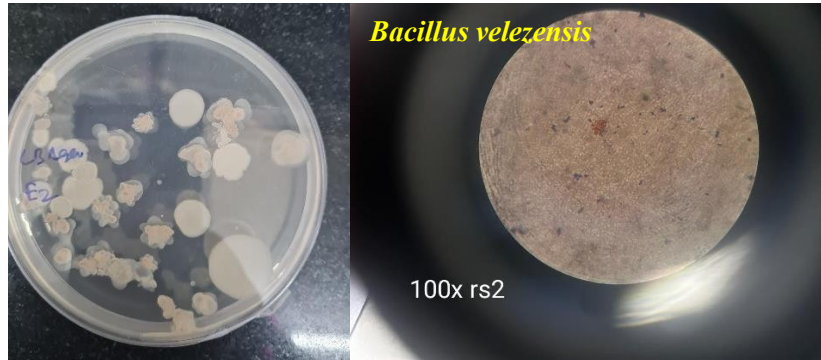

Fig.3. Isolation of genomic DNA (Left), and Identification of bacteria responsible for degradation of commercial samples (Right).

During the commercial sample degradation, *Bacillus velezensis* bacteria are responsible for the degradation which is confirmed from the isolation of bacteria experiment.

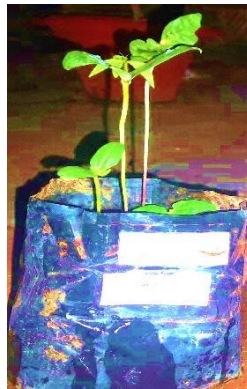

Fig.4. Seed germination test for commercial sample incorporated soil showing the decrement in plant growth.

**Mould growth resistance:**

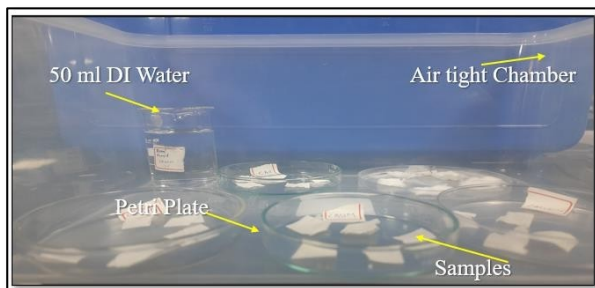

Fig.5. Experimental setup for Mould growth resistance test

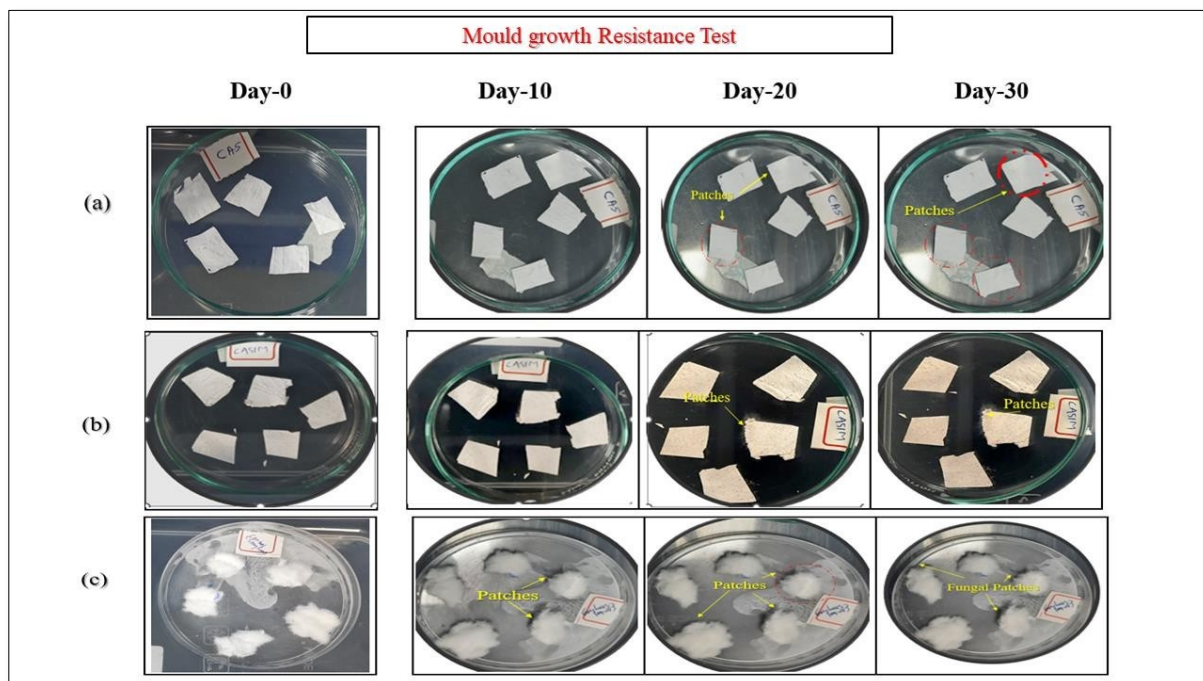

Fig.6. (a) Mould growth resistance test images of Neat CA, (b) Optimized MCA-2 (CA/MPH membrane) and (c) Commercial sample (Stayfree Secure Wings Sanitary pads)
